# Supplementary material for: Global prevalence of congenital heart disease in school-age children: a meta-analysis and systematic review
Source: BMC Cardiovasc Disord. 2020 Nov 19;20:488. doi: 10.1186/s12872-020-01781-x (PMC7678306; doi:10.1186/s12872-020-01781-x)
Supplement: Supplementary file 2 — Additional file 2. List of included studies and extracted original data for meta-analyses. [file 12872_2020_1781_MOESM2_ESM.xls]

## Sheet: Unrepaired CHDs
Study ID	Author	Publication year	Country	Investigation time	Age	NO. of Subjects	NO. of CHD cases	Prevalence/1000	VSD	ASD	PDA	PS	AS	MR	TOF	CAA	Dextrocardia	TA/TS	AVI	EA	CHB	PAA	MS	ECD	TGA	CoA	HLHS	SV	TA	Cortriatriaum	PA	IAA	TAPVR	PAPVR	NOS scores
1	Kang, G.	2016	China	2011-2012	6-13	540574	1157	2.14032	499	299	148	58			32																				9
2	Susan UA	2016	Nigeria	2014-2014	5-14	1712	31	18.1075	3	26		1			1																				7
3	Borah, P. K.	2016	India	2010-2013	5-14	10003	20	1.9994	5	7		4	2		2																				7
4	Nisale, Suryakant H	2016	India	2013-2014	5-18	353761	163	0.460763	41	41	23	8	2		19			7	1	1			20												7
5	Liu, F.	2015	China	2010-2012	7-18	12815	158	12.3293																											8
6	Kang, G.	2015	China	2011-2012	5-13	81213	198	2.43803	93	44	20			1	7							1		3						1					8
7	Spitzer, E.	2015	Peru	2014-2014	5-16	1023	20	19.5503		9	4			1					4		1														9
8	Razzaghi, H.	2015	USA	1997-2011	6-17	118408	276	2.33092																											9
9	Bodian, M.	2014	Senegal	2011-2011	5-18	2019	18	8.9153	5	6	4				3																				7
10	Prajapati, Dipanker	2014	Nepal	2011-2013	4-16	34876	38	1.08957	11	18	3	1	1	1										2	1										8
11	Zheng, J. Y.	2013	China	2012-2013	3-15	10338	80	7.73844	4	29	43	1			1																				6
12	Kumari, N. Rama	2013	India	2011-2011	5-16	4213	44	10.4439	6	18	11	2					3									1									6
13	Liu, X. K.	2013	China	2010-2010	7-17	10021	68	6.78575	13	26	20	1			3																				8
14	Beaton, A.	2012	Uganda	2010-2010	5-16	4869	18	3.69686																											7
15	Tao, Jing	2012	China	2009-2009	3-15	12014	70	5.82654	16	9	9	5		3	5			17					2			1	1								7
16	Ba-Saddik, I. A.	2011	Yemen	2004-2005	5-16	6000	58	9.66667	2	4	7	4	3	36	1			1																	8
17	Sadiq, M.	2009	Pakistan	2001-2002	5-15	24980	440	17.6141	246	33	21	50	29	13	13																				8
18	Uner, A.	2009	Turkey	2003-2004	6-15	6035	27	4.4739	1		1	2	1	5																					7
19	Chen, Q. H.	2009	China	2006-2006	4-18	97718	496	5.07583	177	185	110																								8
20	Misra, Mukul	2008	India	2003-2006	4-18	118212	131	1.10818	56	24	3	10	24				1			2	1														8
21	Chen, Q. H.	2008	China	2006-2006	4-18	32578	235	7.21346	92	77	58																								6
22	Marijon, Eloi	2006	Sub-Saharan Africa	2005-2005	6-17	2170	5	2.30415	4		1																								5
23	Zhai, Yongfu	2004	China	2002-2002	7-17	17323	35	2.02044																											7
24	Bahadur, K. C.	2003	Nepal	2001-2001	5-18	9420	12	1.27389																											7
25	Chadha, S. L.	2001	India	1985-1987	5-14	8064	32	3.96825																											7
26	Lee, Hong Jue	2001	Korea	1998-1998	5-12	40402	72	1.78209	38	6	7	7			7		1			2					1										5
27	Bassili, A.	2000	Egypt	1995-1996	5-15	869434	881	1.0133	311	120	59	162	34	128	44	1		18	4	5		9	4	27	18	8		8	6						7
28	Khalil, S	1997	Sudan	1986-1990	5-15	13322	25	1.8766	12	5	2	1	2		2		1																		7
29	Anabwani, G. M.	1996	Kenya	1993-1994	5-15	1115	2	1.79372	1	1																									5
30	Thakur, J. S.	1995	India	1992-1993	5-16	15080	34	2.25464	11	13	2	3	3	3					7																8
31	Moradmand, S	1995	Iran	1992-1992	5-16	13330	13	0.975244	4		2	2	6																						5
32	Refat, M.	1994	Egypt	1990-1991	6-12	8000	21	2.625	4	4	1	7	3	1																					8
33	Vashishtha, V. M.	1993	India	1990-1991	5-15	8449	44	5.20772	18	5	2	4	4	3	6																				6
34	Gupta, I.	1992	India	1989-1990	6-16	13263	8	0.603182	3	2	2								1																5
35	Akman, D.	1982	USA	1978-1978	5-17	4074	9	2.20913	2	2		1		1					1				1	1											6
36	Shaukat M. Malik	1981	Pakistan	1978-1979	5-15	15100	50	3.31126	18	13		1	14		2																				8
37	Shrestha, N. K.	1980	India	1975-1976	5-16	34198	101	2.95339																											8
38	McLaren, M. J.	1979	South Africa	1972-1972	2-18	12050	47	3.90041	24	5		2					5		1	1						1									8
39	Kopecka, B.	1979	Czech Republic	1975-1977	5-16	53726	227	4.22514	95	47																									5
40	Shibata, H.	1977	Japan	1970-1976	15-18	3993	7	1.75307	1	1	2																								6
41	Lue, HC	1976	China	1970-1971	6-16	10321	25	2.42225	6	1	4	2	1		7			1							2	1									7
42	Meszaros, M.	1975	Hungary	1971-1972	7-16	2259	10	4.42674	2	2	3	1	1							1						2									5

## Sheet: CHD diagnoses in childhood
Study ID	Author	Publication year	Country	Investigation time	Age	NO. of Subjects	NO. of CHD cases	Prevalence/1000	VSD	ASD	PDA	PS	AS	MR	TOF	CAA	Dextrocardia	TA/TS	AVI	EA	CHB	PAA	MS	ECD	TGA	CoA	HLHS	SV	TA	Cortriatriaum	PA	IAA	TAPVR	PAPVR	NOS scores
1	Chaikitpinyo, Arnkisa	2015	Thailand，Khon Kaen	2006-2006	5-15	8555	10	1.16891	4	2		1			1																				6
2	Cholkraisuwat, E.	2013	Thailand	2008-2010	6-13	138529	102	0.736308	33	17	4	12	5	1	2			1	1	1	1	1									1				7
3	Sayasathid, Jarun	2010	Thailand	2006-2008	7-12	144293	87	0.60294	36	8	11	14	8	5	3	2		1	1																7
4	Sayasathid, J.	2009	Thailand	2006-2006	6-12	38055	43	1.12994	18	5	7	7	1	3	1			1																	7
5	Marijon, Eloi	2006	Sub-Saharan Africa	2005-2005	6-17	2170	4	1.84332	4		1																								5
6	Khalil, S	1997	Sudan	1986-1990	5-15	13322	20	1.50128	11	4	2	1	2		1		1																		7
7	Refat, M.	1994	Egypt	1990-1991	6-12	8000	12	1.5	3	3	1	4		1																					8
8	Vashishtha, V. M.	1993	India	1990-1991	5-15	8449	31	3.66907																											6
9	Shrestha, N. K.	1980	India	1975-1976	5-16	34198	67	1.95918																											8

## Sheet: List of papers
Unrepaired CHD pool
Study ID	Author	Publication year	Country	Title	Journal	Volume(Issue): Pages
1	Kang, G.	2016	China	Congenital Heart Disease in Local and Migrant Elementary Schoolchildren in Dongguan, China	Am J Cardiol	117(3): p. 461-4
2	Susan UA	2016	Nigeria	Prevalence of Congenital Heart Diseases Among Primary School Children in the Niger Delta of Nigeria, West Africa	Annals of Pediatrics & Child Health	4(5): p. 1116
3	Borah, P. K.	2016	India	Assessment of schoolchildren for congenital heart disease using murmurs and blood pressure as markers	Current Science	110(12): p. 2218-2219
4	Nisale, Suryakant H	2016	India	A study of prevalence and pattern of congenital heart disease and rheumatic heart disease among school children	International Journal of Advances in Medicine	3(4): p. 947-951
5	Liu, F.	2015	China	Prevalence of Congenital Heart Disease in Xinjiang Multi-Ethnic Region of China	PLoS One	10(8): p. e0133961
6	Kang, G.	2015	China	Prevalence and clinical significance of cardiac murmurs in schoolchildren	Arch Dis Child	100(11): p. 1028-31
7	Spitzer, E.	2015	Peru	Screening for Rheumatic Heart Disease among Peruvian Children: A Two-Stage Sampling Observational Study	Plos One	10(7): p. e0133004
8	Razzaghi, H.	2015	USA	Long-term outcomes in children with congenital heart disease: National Health Interview Survey	J Pediatr	166(1): p. 119-24
9	Bodian, M.	2014	Senegal	Prevalence of congenital heart diseases in Koranic schools (daara) in Dakar: a cross-sectional study based on clinical and echocardiographic screening in 2019 school children.	Bull Soc Pathol Exot	108: p. 32-35
10	Prajapati, Dipanker	2014	Nepal	Epidemiological survey of rheumatic fever, rheumatic heart disease and congenital heart disease among school children in Kathmandu valley of Nepal	Nepalese Heart Journal	10(1): p. 1-5
11	Zheng, J. Y.	2013	China	Prevalence of symptomatic congenital heart disease in Tibetan school children	Am J Cardiol	112(9): p. 1468-70
12	Kumari, N. Rama	2013	India	Prevalence of rheumatic and congenital heart disease in school children of Andhra Pradesh, South India	Journal of cardiovascular disease research	4(1): p. 11-14
13	Liu, X. K.	2013	China	The prevalence of congenital heart disease in students of Liangshan prefecture in Sichuan province	Zhonghua nei ke za zhi	52(6): p. 494-497
14	Beaton, A.	2012	Uganda	Echocardiography screening for rheumatic heart disease in Ugandan schoolchildren	Circulation	125(25): p. 3127-32
15	Tao, Jing	2012	China	Congenital heart disease prevalence survey of 12014 children in Chongqing Shizhu	Chongqing Medicine	5: p. 22
16	Ba-Saddik, I. A.	2011	Yemen	Prevalence of rheumatic heart disease among school-children in Aden, Yemen	Ann Trop Paediatr	31(1): p. 37-46
17	Sadiq, M.	2009	Pakistan	Prevalence of rheumatic heart disease in school children of urban Lahore	Heart	95(5): p. 353-7
18	Uner, A.	2009	Turkey	The ratio of congenital heart disease and innocent murmur in children in Van city, the Eastern Turkey	Anadolu Kardiyol Derg	9(1): p. 29-34
19	Chen, Q. H.	2009	China	Epidemiological survey of congenital heart disease among people aged from 4 to 18 in Haidong area of Qinghai province	Zhonghua Yu Fang Yi Xue Za Zhi	43(4): p. 319-21
20	Misra, Mukul	2008	India	Prevalence and pattern of congenital heart disease in school children of eastern Uttar Pradesh	Indian heart journal	61(1): p. 58-60
21	Chen, Q. H.	2008	China	Cross-sectional study of congenital heart disease among Tibetan children aged from 4 to 18 years at different altitudes in Qinghai Province	Chin Med J (Engl)	121(24): p. 2469-72
22	Marijon, Eloi	2006	Sub-Saharan Africa	Prevalence of congenital heart disease in schoolchildren of sub-Saharan Africa, Mozambique	International journal of cardiology	113(3): p. 440-441
23	Zhai, Yongfu	2004	China	A survey on heart murmur inspect rate and congenital heart disease prevalence rate of 25488 students aged 2-17 in jiuquan district	Chinese Journal of Cardiouascular Review	10: p. 13
24	Bahadur, K. C.	2003	Nepal	Prevalence of rheumatic and congenital heart disease in schoolchildren of Kathmandu valley in Nepal	Indian heart journal	55(6): p. 615-618
25	Chadha, S. L.	2001	India	Epidemiological study of congenital heart disease	Indian J Pediatr	68(6): p. 507-10
26	Lee, Hong Jue	2001	Korea	Prevalence of congenital heart disease from the elementary student heart disease screening program	Korean Journal of Preventive Medicine	34(4): p. 427-436
27	Bassili, A.	2000	Egypt	Congenital heart disease among school children in Alexandria, Egypt: An overview on prevalence and relative frequencies	Journal of Tropical Pediatrics	46(6): p. 357-362
28	Khalil, S	1997	Sudan	Prevalence of congenital heart disease among school children of Sahafa Town, Sudan	Eastern Mediterranean Health Journal	3(1): p. 24-8
29	Anabwani, G. M.	1996	Kenya	Prevalence of heart disease in school children in rural Kenya using colour-flow echocardiography.	East African Medical Journal	73(4): p. 215-217
30	Thakur, J. S.	1995	India	Congenital heart disease among school children in Shimla hills	Indian Heart J	47(3): p. 232-5
31	Moradmand, S	1995	Iran	The incidence of Rheumatic and congenital heart disease in school children of Bardsir, Kerman	Iranian Journal of Pediatrics	5(18): p. 167-174
32	Refat, M.	1994	Egypt	A clinicoepidemiological study of heart disease in schoolchildren of Menoufia, Egypt	Ann Saudi Med	14(3): p. 225-9
33	Vashishtha, V. M.	1993	India	Prevalence of congenital heart disease in school children	Indian Pediatr	30(11): p. 1337-40
34	Gupta, I.	1992	India	Epidemiology of rheumatic and congenital heart diseases in school children	J Indian Med Assoc	90(3): p. 57-9
35	Akman, D.	1982	USA	Heart disease in a total population of children: the Bogalusa Heart Study	South Med J	75(10): p. 1177-81
36	Shaukat M. Malik	1981	Pakistan	Prevalence of Heart Disease in School Children of Islamabad	Pakistan Heart J	14(2): p. 2-7
37	Shrestha, N. K.	1980	India	Congenital heart disease in Delhi school children	Indian J Med Res	42: p. 403-7
38	McLaren, M. J.	1979	South Africa	Prevalence of congenital heart disease in black schoolchildren of Soweto, Johannesburg	Br Heart J	41(5): p. 554-8
39	Kopecka, B.	1979	Czech Republic	Prevalence of congenital heart defects in children from the Central Bohemian region in 1975-1977.	Cesko-Slovenska Pediatrie	34(10): p. 577-582
40	Shibata, H.	1977	Japan	Congenital heart disease in high school and college students	Jpn Heart J	18(4): p. 457-61
41	Lue, HC	1976	China	The prevalence and type of congenital heart disease among Chinese	J Formos Med Assoc	75: p. 53-59
42	Meszaros, M.	1975	Hungary	Incidence of congenital heart disease in Hungary	Hum Hered	25(6): p. 513-9
CHD diagnoses in childhood pool
Study ID	Author	Publication year	Country	Title	Journal	Volume(Issue): Pages
1	Chaikitpinyo, Arnkisa	2015	Thailand, Khon Kaen	Rheumatic and congenital heart diseases among school children of Khon Kaen, Thailand: declining prevalence of rheumatic heart disease	Asian Biomed	8(5): p. 645
2	Cholkraisuwat, E.	2013	Thailand	Congenital heart disease in elementary school children in rural Thailand: the role of the trained noncardiologist	Asian Biomedicine	7(2): p. 287-291
3	Sayasathid, Jarun	2010	Thailand	The prevalence of unrecognized congenital heart disease among healthy elementary school students in northern Thailand	Asian Biomed	4(1): p. 171-175
4	Sayasathid, J.	2009	Thailand	Unrecognized congenital heart disease among Thai children	J Med Assoc Thai	92(3): p. 356-9
5	Marijon, Eloi	2006	Sub-Saharan Africa	Prevalence of congenital heart disease in schoolchildren of sub-Saharan Africa, Mozambique	International journal of cardiology	113(3): p. 440-441
6	Khalil, S	1997	Sudan	Prevalence of congenital heart disease among school children of Sahafa Town, Sudan	Eastern Mediterranean Health Journal	3(1): p. 24-8
7	Refat, M.	1994	Egypt	A clinicoepidemiological study of heart disease in schoolchildren of Menoufia, Egypt	Ann Saudi Med	14(3): p. 225-9
8	Vashishtha, V. M.	1993	India	Prevalence of congenital heart disease in school children	Indian Pediatr	30(11): p. 1337-40
9	Shrestha, N. K.	1980	India	Congenital heart disease in Delhi school children	Indian J Med Res	42: p. 403-7

## Sheet: Abbreviations
Abbreviations:
VSD	Ventricular Septal Defect
ASD	Atrial Septal Defect
PDA	Patent Ductus Arteriosus
PS	Pulmonary Stenosis
TOF	Tetralogy of Fallot
TGA	Transposition of the Great Arteries
CoA	Coarctation of the Aorta
AVI	Aortic Valve Insufficiency
PAA	Pulmonary Arteriovenous Aneurysm
AS	Aortic Stenosis
HLHS	Hypoplastic Left Heart Syndrome
MR	Mitral Insufficiency/Regurgitation
SV	Single Ventricle
TA/TS	Tricuspid Atresia or Stenosis
DORV	Double outlet right ventricle
CHB	Congenital Heart Block
PA	Pulmonary Atresia
TA	Truncus Arteriosus
TAPVR	Total Anomalous Pulmonary Venous Return
MS	Mitral Stenosis
CAA	Coronary Artery Aneurysm
EA	Ebstein Anomaly
PAPVR	Partial Anomalous Pulmonary Venous Return
IAA	Interrupted Aortic Arch
CT	Cor Triatriatum
CHD	Congenital Heart Defect
LVOTO	Left Ventricular Outflow Tract Obstruction
RVOTO	Right Ventricular Outflow Tract Obstruction
APVR	Anomalous Pulmonary Venous Return
AVSD	Atrioventricular Septal Defect
ICD10	International Statistical Classification of Diseases and Related Health Problems 10th Revision
GNI	Gross National Income
PM	Particulate Matter
